# Supplementary material for: Adolescent sexual and reproductive health research in sub-Saharan Africa: a scoping review of substantive focus, research volume, geographic distribution and Africa-led inquiry
Source: PubMed Central journal article supplement — BMJ Glob Health. 2021 Feb 10;6(2):e004129. doi: 10.1136/bmjgh-2020-004129 (PMC7878134; doi:10.1136/bmjgh-2020-004129), 2021-02-10
Supplement: bmjgh-2020-004129supp001.pdf [file bmjgh-2020-004129supp001.pdf]

## Appendix 1 – Search terms

### ASRH Search terms

| <i>Interventions</i>                                                                                                                                                                                                | <i>Issues</i>                                                                                                                                                                                                           |
|---------------------------------------------------------------------------------------------------------------------------------------------------------------------------------------------------------------------|-------------------------------------------------------------------------------------------------------------------------------------------------------------------------------------------------------------------------|
| 'Comprehensive sexuality education' OR 'sexuality education' OR 'life skills education' OR 'sex education' OR 'HIV education' OR 'Family life education' AND Africa NOT America NOT Europe NOT UK NOT China NOT US* | 'Early marriage' OR 'Forced marriage' OR 'Child marriage' AND Africa NOT America NOT Europe NOT UK NOT China NOT US*                                                                                                    |
| 'Youth friendly' OR Youth-friendly health services' OR 'Adolescent friendly services' AND Africa NOT America NOT Europe NOT UK NOT China NOT US*                                                                    | 'Female genital mutilation' OR 'Female genital cutting' OR 'FGM' AND Africa NOT America NOT Europe NOT UK NOT China NOT US*                                                                                             |
| 'Safe spaces' AND 'Adolescents' OR 'Young people' AND Africa NOT America NOT Europe NOT UK NOT China NOT US*                                                                                                        | 'Sexual and Gender-based violence' OR 'Gender-based violence' or 'Sexual violence' OR 'Sexual coercion' OR 'GBV' OR SGBV' AND Africa NOT America NOT Europe NOT UK NOT China NOT US*                                    |
| 'School-based interventions' OR School based interventions' AND Africa NOT America NOT Europe NOT UK NOT China NOT US*                                                                                              | 'Sexual initiation' OR 'sexual debut' OR 'age at first sex' AND Africa NOT America NOT Europe NOT UK NOT China NOT US*                                                                                                  |
| 'Parental engagement' OR 'Parental interventions' OR 'Parental based interventions' AND 'sexual and reproductive health' AND Africa NOT America NOT Europe NOT UK NOT China NOT US*                                 | 'HIV/AIDS' OR 'HIV' OR 'Adherence' OR Disclosure OR 'Retention in care' OR 'HIV status' AND 'Young people' OR 'Adolescents' AND Africa NOT America NOT Europe NOT UK NOT China NOT US*                                  |
| 'Media intervention' OR Mass media intervention AND 'sexual and reproductive health' AND 'Adolescents' OR 'Young people' AND Africa NOT America NOT Europe NOT UK NOT China NOT US*                                 | 'STIs' OR 'STDs' OR 'Sexually transmitted infections' OR 'Sexually transmitted diseases' AND 'Adolescents' AND Africa NOT America NOT Europe NOT UK NOT China NOT US*                                                   |
| 'Peer-based intervention' OR Peer-led AND 'Intervention' AND 'Adolescents' OR 'Young people' AND Africa NOT America NOT Europe NOT UK NOT China NOT US*                                                             | 'Teenage pregnancy' OR Adolescent pregnancy' OR 'Adolescent fertility OR 'Early unintended pregnancy' AND Africa NOT America NOT Europe NOT UK NOT China NOT US*                                                        |
| 'Mentorship intervention' AND 'Role modelling intervention' AND 'Adolescents' OR 'Young people' AND Africa NOT America NOT Europe NOT UK NOT China NOT US*                                                          | 'Unsafe abortion' OR 'Termination of pregnancy' OR 'Pregnancy termination' OR 'Post-abortion complications' OR 'abortion' AND 'Adolescents' OR 'Young girls' AND Africa NOT America NOT Europe NOT UK NOT China NOT US* |
| 'Community engagement' AND Africa NOT America NOT Europe NOT UK NOT China NOT US*                                                                                                                                   | 'Contraceptives' OR 'Family planning' AND 'Access' AND 'Use' AND 'Adolescents' AND Africa NOT America NOT Europe NOT UK NOT China NOT US*                                                                               |

|                                                                                                                                          |                                                                                                      |
|------------------------------------------------------------------------------------------------------------------------------------------|------------------------------------------------------------------------------------------------------|
| 'Engagement intervention' AND 'Engagement of boys' AND 'Gender equity' AND Africa NOT America NOT Europe NOT UK NOT China NOT US*        | 'Menstrual Hygiene' OR 'Feminine Hygiene' AND Africa NOT America NOT Europe NOT UK NOT China NOT US* |
| 'Economic empowerment intervention' OR 'Empowerment intervention' AND Africa NOT America NOT Europe NOT UK NOT China NOT US*             | 'Male Circumcision' AND Africa NOT America NOT Europe NOT UK NOT China NOT US*                       |
| 'Implementation' OR 'Policies' OR 'laws' AND 'sexual and reproductive health' AND Africa NOT America NOT Europe NOT UK NOT China NOT US* | 'Gender Norms' OR 'Social Norms' AND Africa NOT America NOT Europe NOT UK NOT China NOT US*          |
| 'Partner oriented interventions' OR 'partner-oriented intervention' AND Africa NOT America NOT Europe NOT UK NOT China NOT US*           |                                                                                                      |
