# Supplementary material for: Adolescent sexual and reproductive health research in sub-Saharan Africa: a scoping review of substantive focus, research volume, geographic distribution and Africa-led inquiry
Source: PubMed Central journal article supplement — BMJ Glob Health. 2021 Feb 10;6(2):e004129. doi: 10.1136/bmjgh-2020-004129 (PMC7878134; doi:10.1136/bmjgh-2020-004129), 2021-02-10
Supplement: bmjgh-2020-004129supp002.pdf [file bmjgh-2020-004129supp002.pdf]

**Appendix 2 – Data extraction framework**

| <b>Main Category</b>               | <b>Subcategory</b>                                 | <b>Description</b>                                                                                                                                    |
|------------------------------------|----------------------------------------------------|-------------------------------------------------------------------------------------------------------------------------------------------------------|
| <i>Title</i>                       |                                                    |                                                                                                                                                       |
| <i>Author</i>                      |                                                    |                                                                                                                                                       |
| <i>Lead author</i>                 |                                                    | Indicate where the lead author is based (we will determine if a lead author is African or non-African by the institutional affiliation of the author) |
| <i>Country of Study's focus</i>    |                                                    |                                                                                                                                                       |
| <i>Author country affiliations</i> |                                                    |                                                                                                                                                       |
|                                    | Country of first author                            | the country where the lead author is affiliated                                                                                                       |
|                                    | Country of last author                             | the country where the last author is affiliated                                                                                                       |
|                                    | First or Last author is from country of focus      | This is a yes/no indication based on the previous data                                                                                                |
|                                    | Includes at least one author from country of focus | Indicate if at least one author is based                                                                                                              |
| <i>Number of Countries</i>         |                                                    | This only applies if it is a multicounty study                                                                                                        |
| <i>Author composition</i>          |                                                    |                                                                                                                                                       |
|                                    | Single author                                      |                                                                                                                                                       |
|                                    | Multiple author                                    |                                                                                                                                                       |
| <i>Journal</i>                     |                                                    |                                                                                                                                                       |
| <i>Journal Coverage</i>            |                                                    |                                                                                                                                                       |
|                                    | African/regional                                   |                                                                                                                                                       |
|                                    | National                                           |                                                                                                                                                       |
|                                    | International                                      |                                                                                                                                                       |
| <i>Journal Impact factor</i>       |                                                    |                                                                                                                                                       |
| <i>Subregion</i>                   |                                                    |                                                                                                                                                       |
|                                    | East Africa                                        |                                                                                                                                                       |
|                                    | West/Central Africa                                |                                                                                                                                                       |
|                                    | Southern Africa                                    |                                                                                                                                                       |
| <i>Year of Publication</i>         |                                                    |                                                                                                                                                       |
| <i>Language</i>                    |                                                    |                                                                                                                                                       |
|                                    | English                                            |                                                                                                                                                       |
|                                    | French                                             |                                                                                                                                                       |
| <i>Funders</i>                     |                                                    | Indicate where the lead author is based (we will                                                                                                      |

|                                                                             |                                                                                                                                                                                                      |
|-----------------------------------------------------------------------------|------------------------------------------------------------------------------------------------------------------------------------------------------------------------------------------------------|
|                                                                             | determine if a lead author is African or non-African by the institutional affiliation of the author)                                                                                                 |
| <i>Collaboration type</i>                                                   |                                                                                                                                                                                                      |
| Only authors from the country of focus                                      | All authors come from the country of study and affiliated with a country institution                                                                                                                 |
| Authors include individuals from US top universities                        | Country of study authors plus US Top university authors (Top 20 USA universities - Webometrics)                                                                                                      |
| Authors include individuals from US/Canada but not Top US university (only) | Country of study Plus US and Canada but not the top US universities                                                                                                                                  |
| Authors include individuals from Europe                                     | Country of study plus Europe                                                                                                                                                                         |
| Authors include individuals from other Africa countries                     | Country of study plus Authors from a mixture of African countries.                                                                                                                                   |
| Authors include individuals from multiple(more than 3 places) locales       | Individuals from other locales other than the Country of study that can fit any other categories in 1-8                                                                                              |
| Authors include Asian                                                       | Country of study plus Asian                                                                                                                                                                          |
| Authors include Australia                                                   | Country of Study plus Australia                                                                                                                                                                      |
| <i>Thematic focus</i>                                                       |                                                                                                                                                                                                      |
| If describing a problem                                                     | *Identify the problem in focus (eg, child marriage, unplanned pregnancy, risky sexual behaviors, abortion)                                                                                           |
| If an intervention study                                                    |                                                                                                                                                                                                      |
| <i>Methodology</i>                                                          |                                                                                                                                                                                                      |
| Study design                                                                | Specify the study design adopted (eg, cross-sectional design, case study, pre-study, poststudy design, longitudinal study, mixed methods, randomized control trial, qualitative study, review study) |
| Population                                                                  | Describe the characteristics of the target population                                                                                                                                                |
| Sampling Strategy                                                           | Describe how sampling was done if applicable                                                                                                                                                         |
| Data collection                                                             | Specify the methods of data collection                                                                                                                                                               |

|                          |                                                                                                                                                                                                                                                                                                                                                                                                                                                                                                                                                                                                                                                                                                                                                                                   |                                                                         |
|--------------------------|-----------------------------------------------------------------------------------------------------------------------------------------------------------------------------------------------------------------------------------------------------------------------------------------------------------------------------------------------------------------------------------------------------------------------------------------------------------------------------------------------------------------------------------------------------------------------------------------------------------------------------------------------------------------------------------------------------------------------------------------------------------------------------------|-------------------------------------------------------------------------|
|                          | Data type                                                                                                                                                                                                                                                                                                                                                                                                                                                                                                                                                                                                                                                                                                                                                                         | Specify whether the data is primary, secondary, or otherwise            |
|                          | Outcome measures                                                                                                                                                                                                                                                                                                                                                                                                                                                                                                                                                                                                                                                                                                                                                                  | Indicate the outcome measures for quantitative studies                  |
|                          | Data analysis                                                                                                                                                                                                                                                                                                                                                                                                                                                                                                                                                                                                                                                                                                                                                                     | Indicate method of data analysis                                        |
| <b>Results</b>           |                                                                                                                                                                                                                                                                                                                                                                                                                                                                                                                                                                                                                                                                                                                                                                                   |                                                                         |
|                          | Reported outcomes                                                                                                                                                                                                                                                                                                                                                                                                                                                                                                                                                                                                                                                                                                                                                                 | Indicate the prevalence reported<br>Highlight the determinants reported |
|                          | Key findings                                                                                                                                                                                                                                                                                                                                                                                                                                                                                                                                                                                                                                                                                                                                                                      | Summarise the key findings                                              |
| <b>Conclusion</b>        |                                                                                                                                                                                                                                                                                                                                                                                                                                                                                                                                                                                                                                                                                                                                                                                   |                                                                         |
|                          |                                                                                                                                                                                                                                                                                                                                                                                                                                                                                                                                                                                                                                                                                                                                                                                   | A summary of the conclusion                                             |
| <b>Limitations</b>       |                                                                                                                                                                                                                                                                                                                                                                                                                                                                                                                                                                                                                                                                                                                                                                                   |                                                                         |
|                          |                                                                                                                                                                                                                                                                                                                                                                                                                                                                                                                                                                                                                                                                                                                                                                                   | A summary of the limitations                                            |
| <b>* Specific themes</b> | Abortion, access and use of contraceptives, adolescent and youth-friendly services, comprehensive sexuality education, child marriage, creating safe spaces for adolescent girls, early and forced marriage, economic empowerment of girls, female genital mutilation, gender and sexual-based violence, gender norms, gender socialization, harmful cultural practices, HIV, HPV, media campaigns and large scale communications intervention, male circumcision, mentoring and positive role-modeling, menstrual hygiene, peer-focused interventions, partner-oriented intervention and promoting laws and policies on their implementation, sexual behavior and transactional sex, sexual initiation, sexual coercion, STIs, school-based interventions, and teenage pregnancy |                                                                         |
